# Supplementary material for: Extremely low-frequency pulses of faint magnetic field induce mitophagy to rejuvenate mitochondria
Source: PubMed Central journal article supplement (PMC9098439; doi:10.1038/s42003-022-03389-7), 2022-05-12

**Supplementary information for**

**Extremely low-frequency pulses of faint magnetic field induce mitophagy to rejuvenate mitochondria**

Takuro Toda<sup>1</sup>, Mikako Ito<sup>1</sup>, Jun-ichi Takeda<sup>1</sup>, Akio Masuda<sup>1</sup>, Hiroyuki Mino<sup>2</sup>, Nobutaka Hattori<sup>3</sup>, Kaneo Mohri<sup>4</sup>, Kinji Ohno<sup>1\*</sup>

<sup>1</sup>Division of Neurogenetics, Center for Neurological Diseases and Cancer, Nagoya University Graduate School of Medicine, Nagoya, Japan

<sup>2</sup>Division of Material Science, Nagoya University Graduate School of Science, Nagoya, Japan

<sup>3</sup>Department of Neurology, Juntendo University, Tokyo, Japan

<sup>4</sup>Nagoya Industrial Science Research Institute, Nagoya, Japan

**This PDF file includes:**

Supplementary Table 1, 2

Supplementary Figure 1-6

**Supplementary Table1. List of abbreviations**

| <b>Abbreviation</b> | <b>Definition</b>                                               |
|---------------------|-----------------------------------------------------------------|
| WMF                 | weak magnetic fields                                            |
| ELF                 | extremely low-frequency                                         |
| ETC                 | electron transport chain                                        |
| ROS                 | reactive oxygen species                                         |
| PINK1               | PTEN-induced kinase 1                                           |
| TMRM                | Tetramethylrhodamine, Methyl Ester, Perchlorate                 |
| OCR                 | oxygen consumption rate                                         |
| DCPIP               | 2, 6-dichlorophenolindophenol                                   |
| SDH                 | succinate dehydrogenase                                         |
| SQR                 | succinate:quinone reductase                                     |
| SCR                 | succinate cytochrome <i>c</i> reductase                         |
| SDHA                | succinate dehydrogenase [ubiquinone] flavoprotein subunit       |
| SDHB                | succinate dehydrogenase [ubiquinone] iron-sulfur subunit        |
| SDHC                | succinate dehydrogenase cytochrome b560 subunit                 |
| SDHD                | succinate dehydrogenase [ubiquinone] cytochrome b small subunit |

**Supplementary Table 2. The effects of Opti-ELF-WMF on mitochondrial mass and mitochondrial membrane potential in six cell lines**

| Cells     | Mitochondrial mass<br>(MitoTracker Green) at 3 h<br>(%) | Mitochondrial membrane<br>potential (TMRM) at 12 h<br>(%) |
|-----------|---------------------------------------------------------|-----------------------------------------------------------|
| AML12     | 73.42 ± 2.26 <sup>**</sup>                              | 110.43 ± 4.15 <sup>*</sup>                                |
| Neuro2a   | 75.68 ± 3.11 <sup>**</sup>                              | 104.86 ± 4.31                                             |
| C2C12     | 67.96 ± 1.31 <sup>****</sup>                            | 106.95 ± 1.79 <sup>*</sup>                                |
| Human iPS | 84.65 ± 2.76 <sup>**</sup>                              | 116.66 ± 1.33 <sup>*</sup>                                |
| HEK       | 82.55 ± 3.27 <sup>***</sup>                             | 106.36 ± 6.35                                             |
| HeLa      | 84.06 ± 5.15 <sup>**</sup>                              | 102.85 ± 0.39 <sup>*</sup>                                |

Mean and SD are indicated ( $n = 4$  dishes each; <sup>\*</sup> $q < 0.05$ , <sup>\*\*</sup> $q < 0.01$ , <sup>\*\*\*</sup> $q < 0.001$ , <sup>\*\*\*\*</sup> $q < 0.001$  by multiple Student's  $t$ -tests).

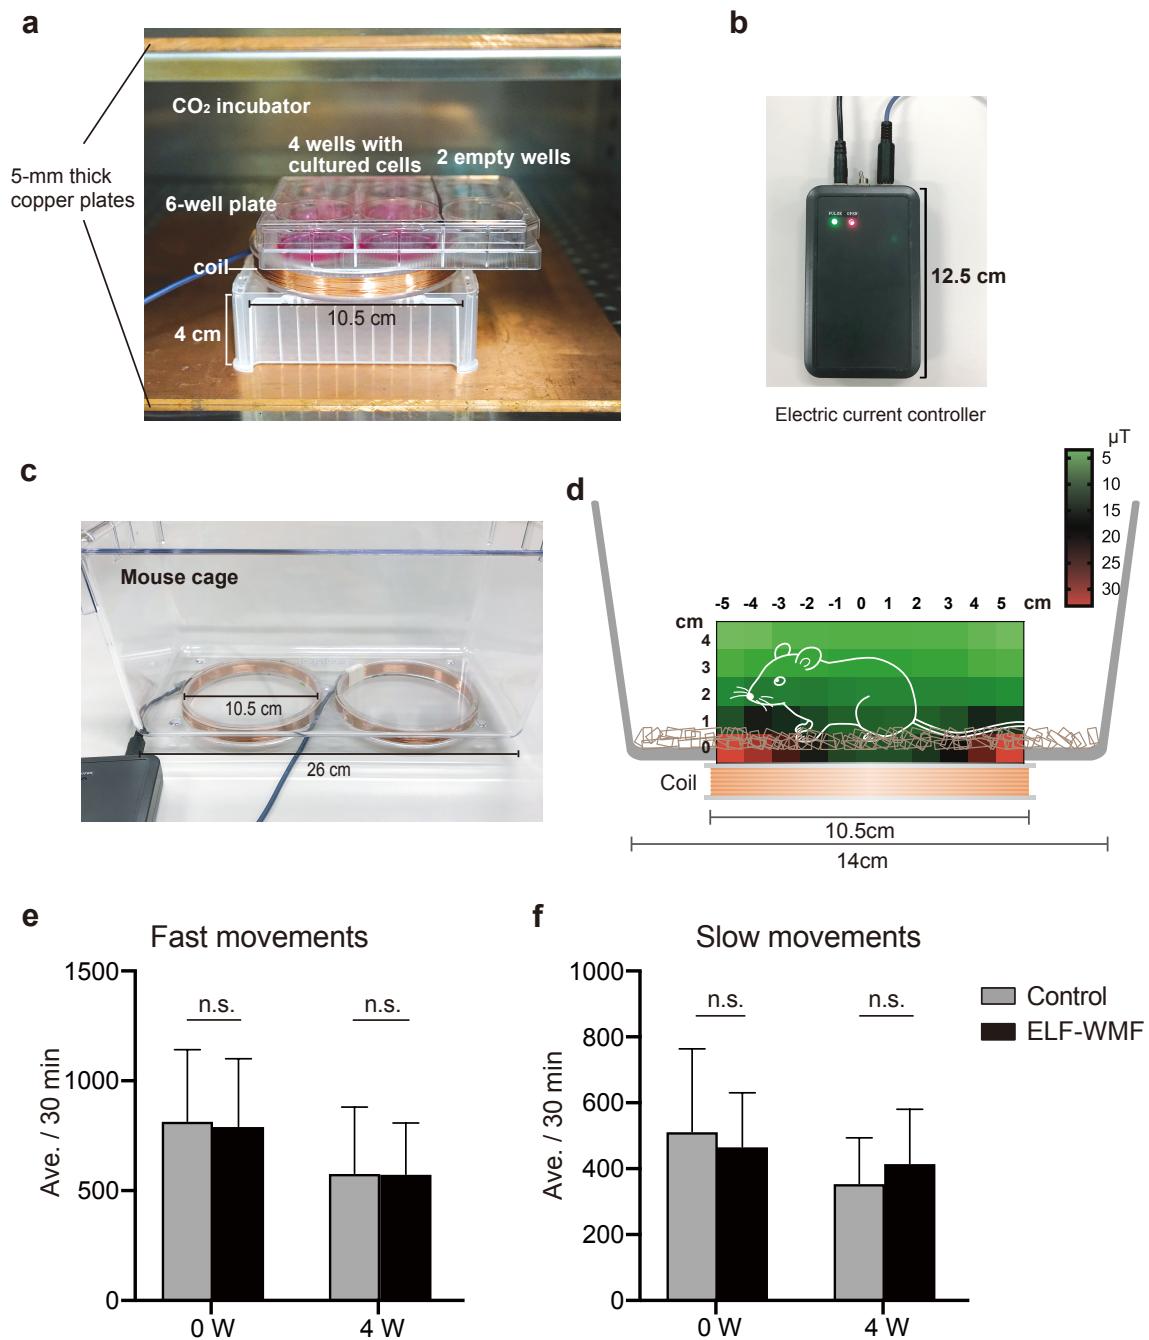

**Supplementary Figure 1. The setup of the ELF-WMF device and lack of the effect of Opti-ELF-WMF for 4 weeks on the open-field locomotor activities in wild-type mice, related to Figure 1.**

**a** ELF-WMF setup for cultured cell. Four of the six wells were used for cell culture. All cells were fit within a 10.5-cm coil. Cells were sandwiched by copper plates, and the coil was placed 4 cm above the bottom plate. Current was applied clockwise when viewed from the top. Cells were cultured ~1 cm above the top of the coil, and the magnetic field

intensities can be referred to the color coding in **d**. **b** Electric current controller for the ELF-WMF coil. **c** Two ELF-WMF coils were placed directly beneath a cage for mouse studies. Current was applied clockwise for both coils when viewed from the top. **d** Color coding of measured magnetic field intensities in a mouse cage above a coil. Exposure to Opti-ELF-WMF for 4 weeks had no effect on fast (**e**) and slow (**f**) movements of wild-type mice as determined by an open-field locomotor activity test (mean  $\pm$  SD,  $n = 14$  mice each; no statistical [n.s.] difference by Kruskal–Wallis test).

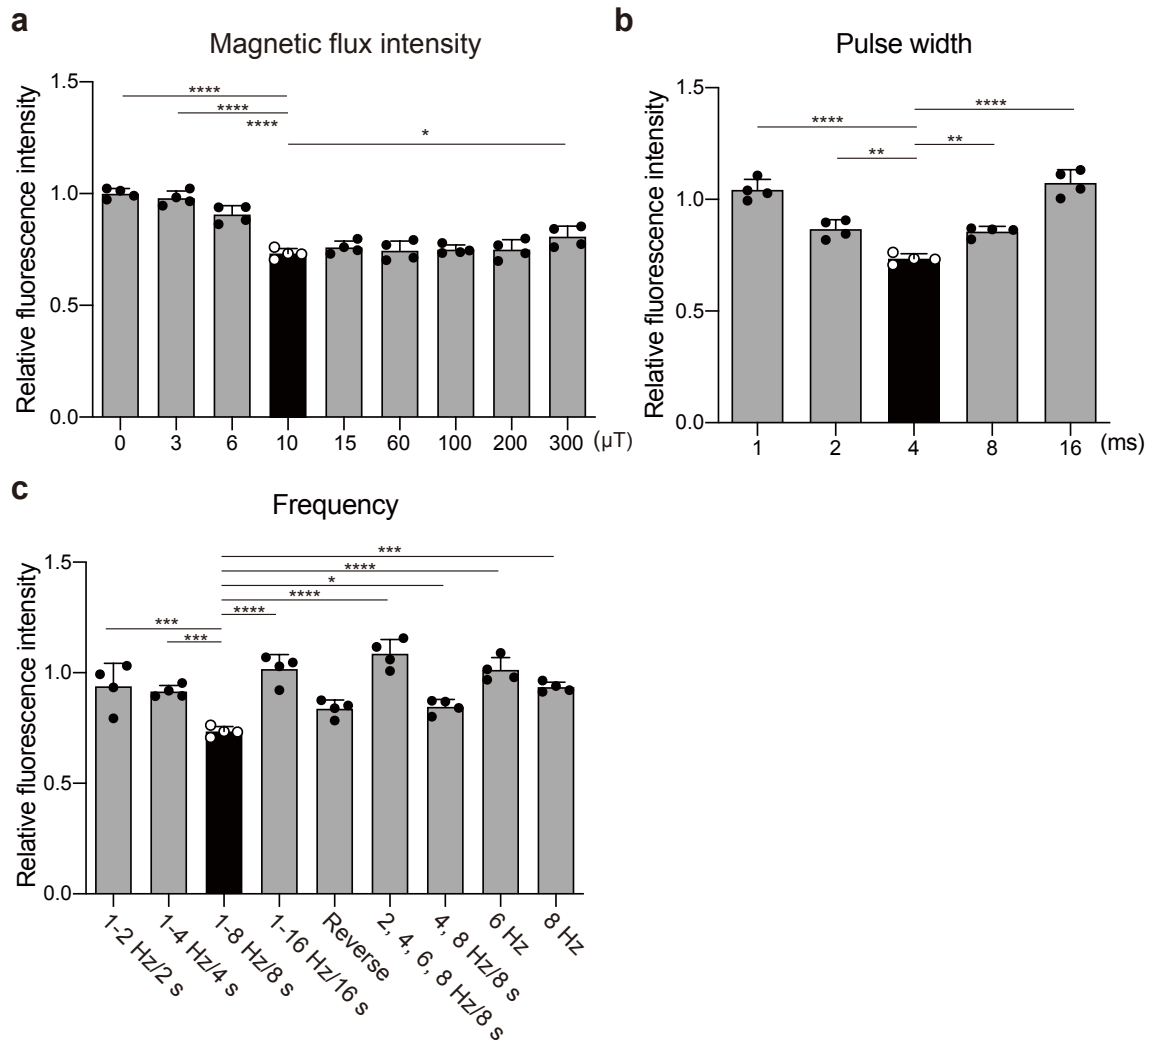

### Supplementary Figure 2. Optimization of ELF-WMF.

Optimization of magnetic flux intensity (a), pulse width (b), and pulse frequency (c) of ELF-WMF to reduce the mitochondrial mass (MitoTracker Green) of AML12 cells in 3 h (mean  $\pm$  SD,  $n = 4$  culture dishes each; \*  $p < 0.05$ , \*\*  $p < 0.01$ , \*\*\*  $p < 0.001$ , and \*\*\*\*  $p < 0.0001$  by one-way ANOVA followed by Dunnett's posthoc test between the black bar and the gray bars). Conditions of Opti-ELF-WMF are indicated by black bars.

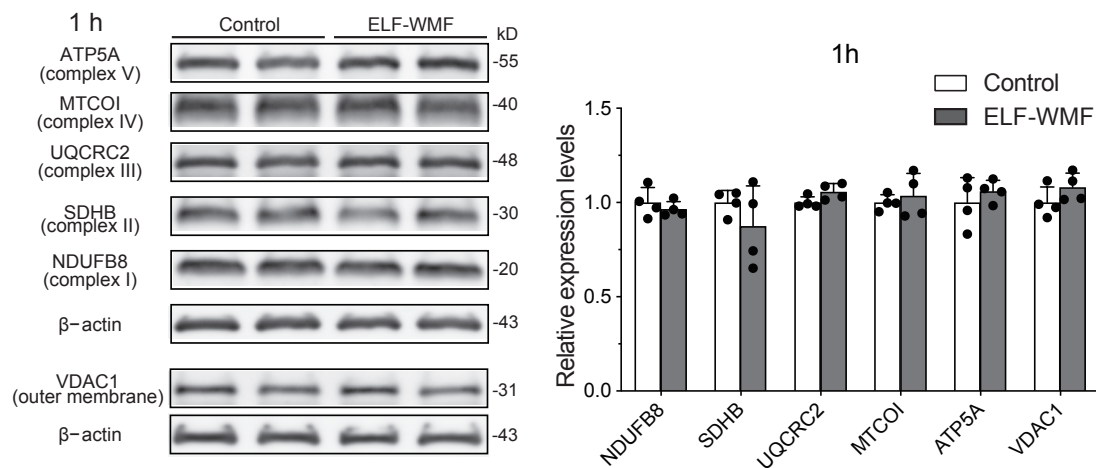

**Supplementary Figure 3. Exposure to Opti-ELF-WMF for 1 h did not change the amounts of mitochondrial proteins in AML12 cells, related to Figure 3.**

Western blot analysis of mitochondrial oxidative phosphorylation proteins and a mitochondrial outer membrane protein, VDAC1, in AML12 cells exposed to Opti-ELF-WMF for 1 h (mean  $\pm$  SD,  $n = 4$  culture dishes each; no statistical difference by multiple Student's  $t$ -tests).

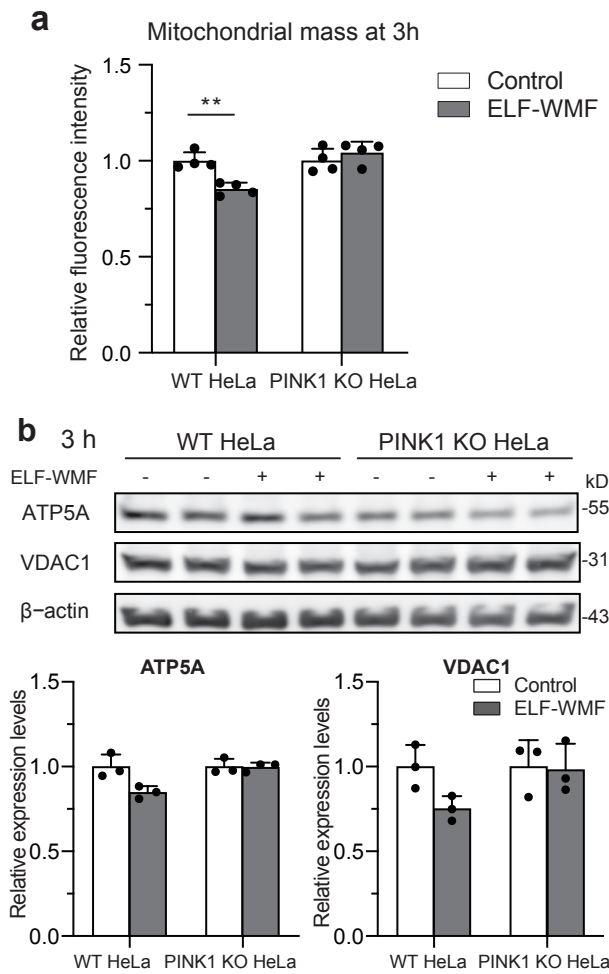

**Supplementary Figure 4. Opti-ELF-WMF failed to induce mitophagy at 3 h in PINK1-kocked out (KO) HeLa cells, related to Figure 4.**

**a** Mitochondrial mass (MitoTracker Green) of wild-type (WT) and PINK1 KO HeLa cells exposed to Opti-ELF-WMF for 3 h (mean  $\pm$  SD,  $n = 4$  dishes each;  $**q < 0.01$  by multiple Student's  $t$ -tests). **b** Representative duplicates of western blot analysis for ATP5A and VDAC1 in WT and PINK1 KO HeLa cells incubated under Opti-ELF-WMF for 3 h (mean  $\pm$  SD,  $n = 4$  dishes each; no statistical difference by multiple Student's  $t$ -tests).



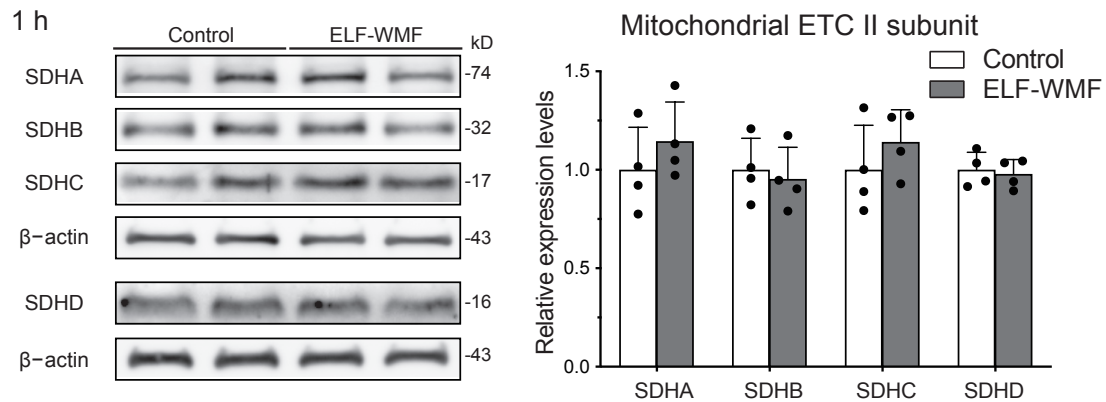

**Supplementary Figure 5. Exposure to Opti-ELF-WMF for 1 h had no effects on the amount of mitochondrial ETC II subunits in AML12 cells, related to Figure 6.**

Representative duplicates of western blot analysis for mitochondrial ETC II subunits of AML12 cells exposed to Opti-ELF-WMF for 1 h (mean  $\pm$  SD,  $n = 4$  dishes each; no statistical difference was observed by multiple Student's  $t$ -tests).

## Supplementary Figure 6. Original blot images

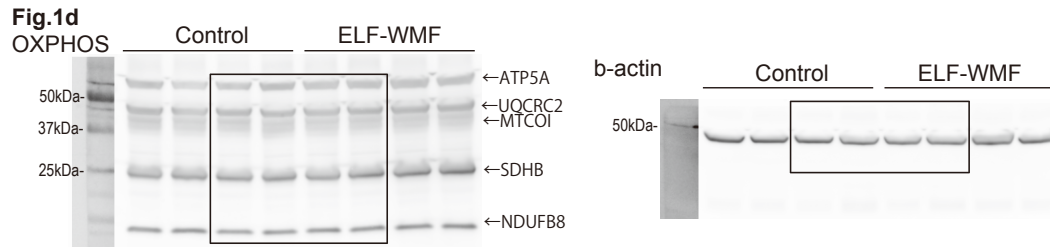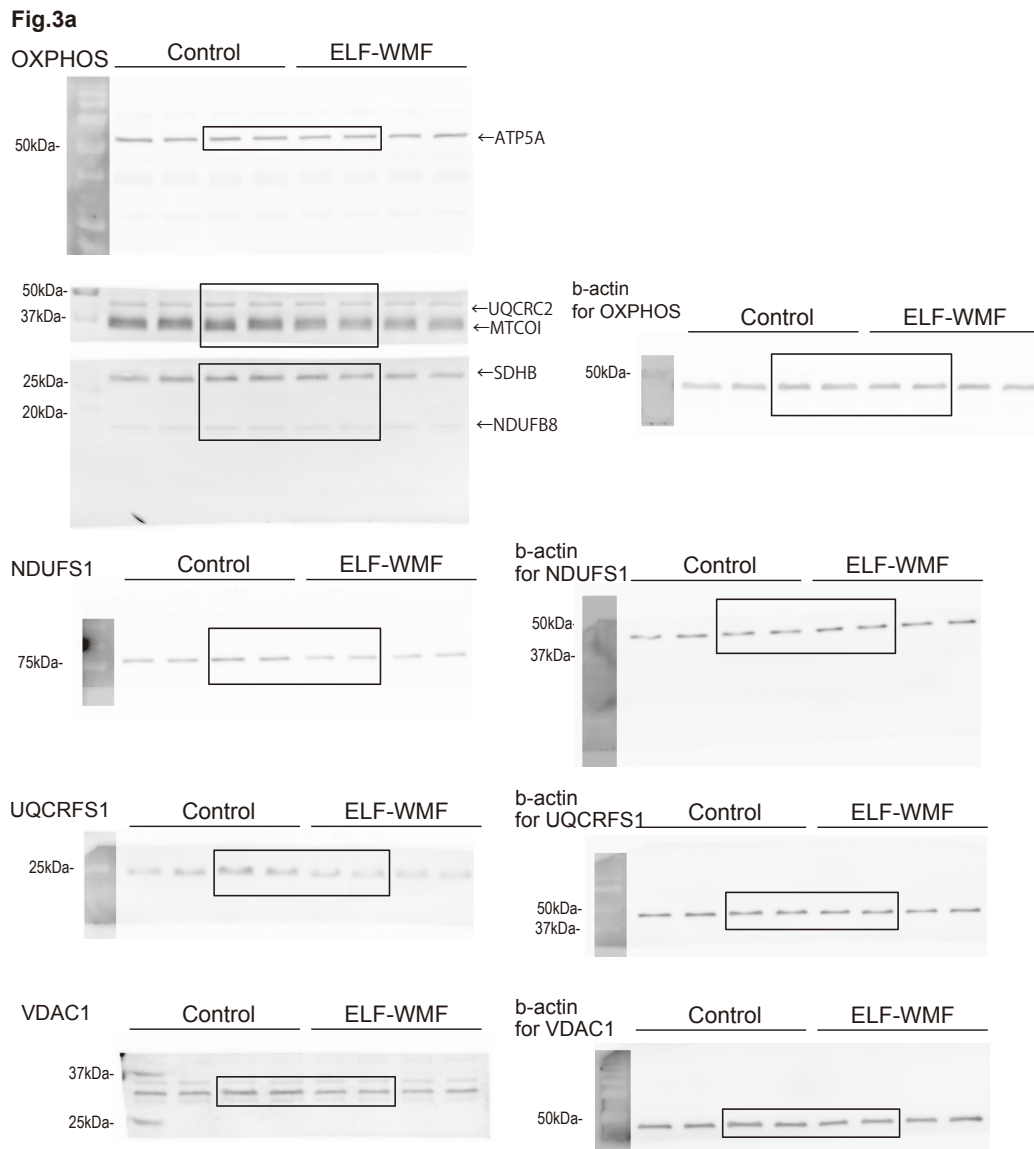

**Fig.3b**

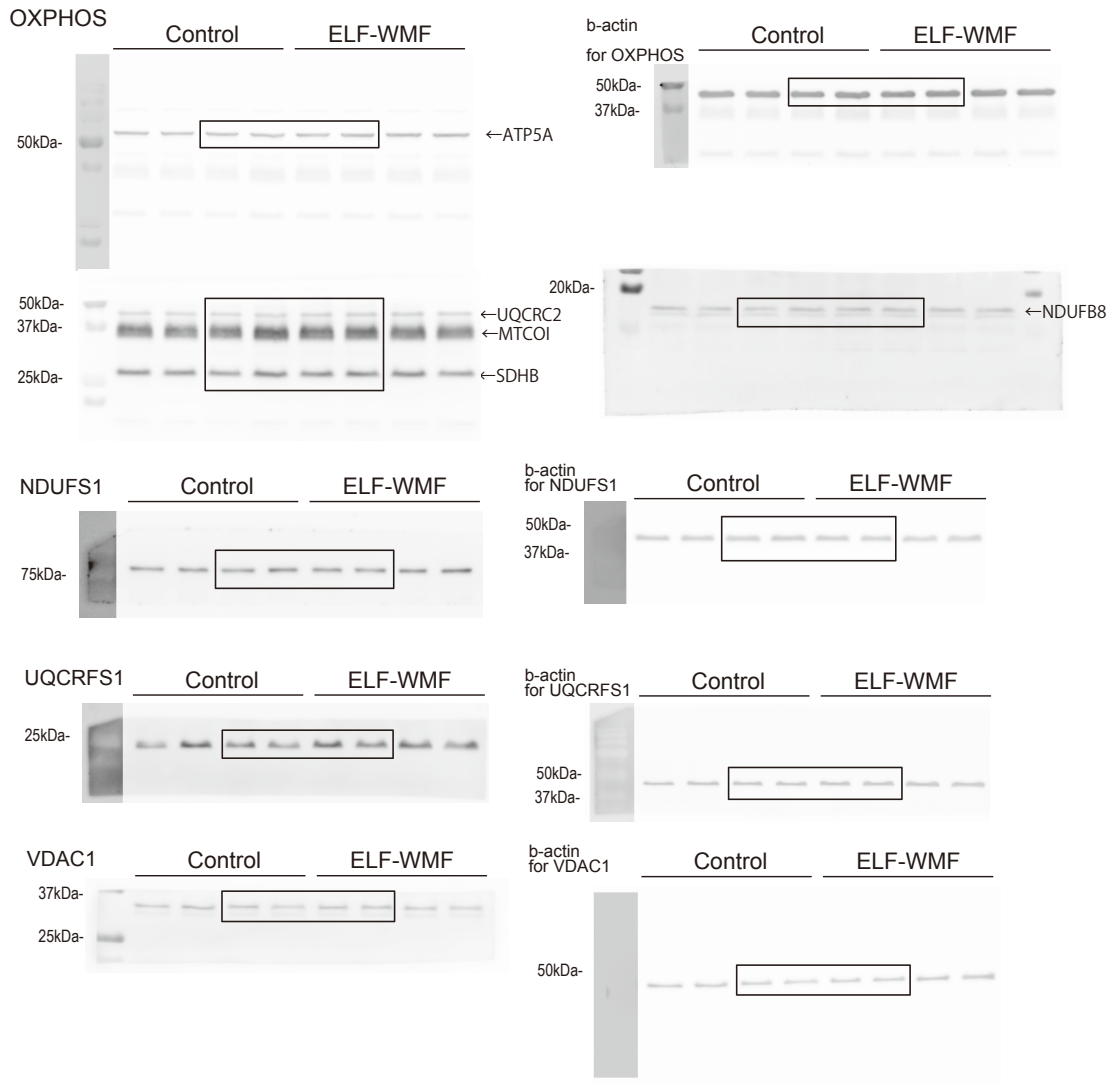

**Fig.4a**

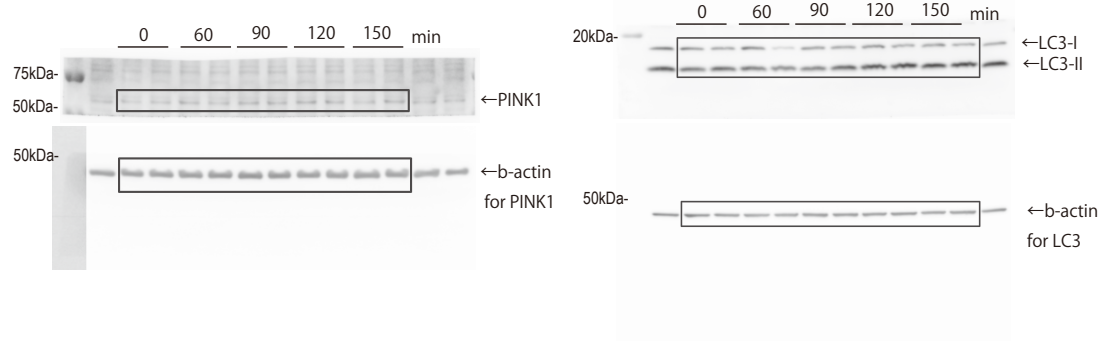

**Fig.4b Whole**

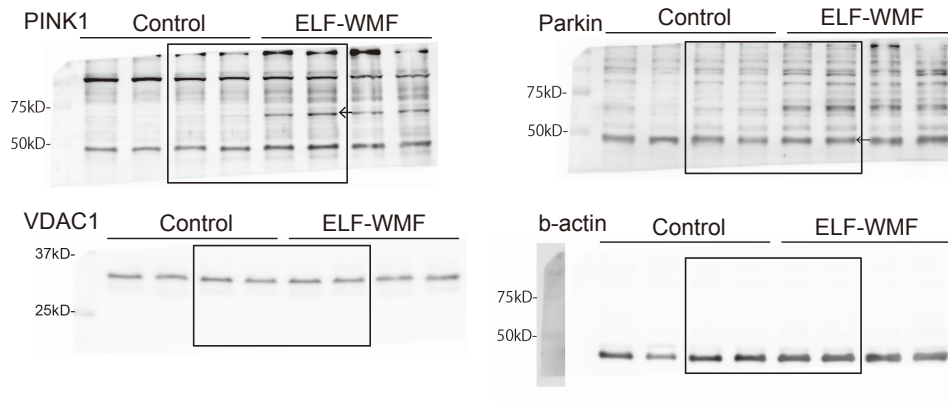

**Fig.4b Cytosol**

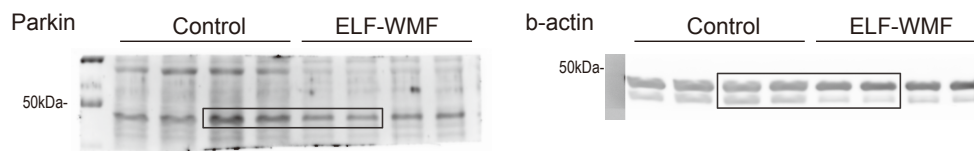

**Fig.4b Mitochondria**

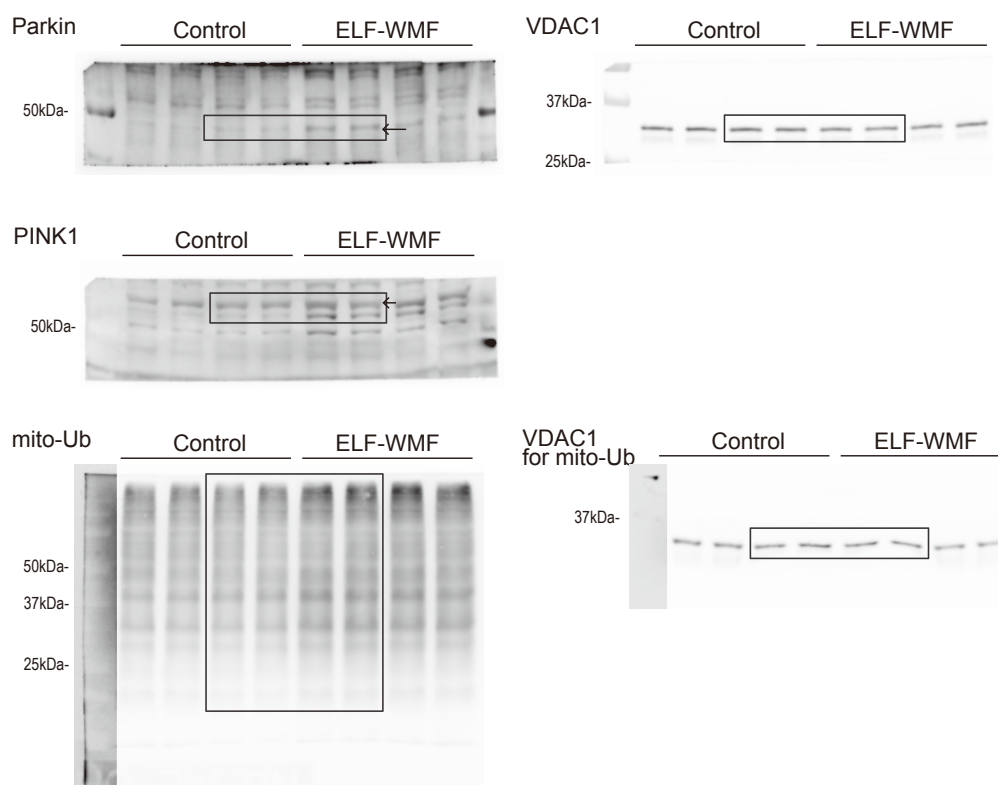

Fig.5

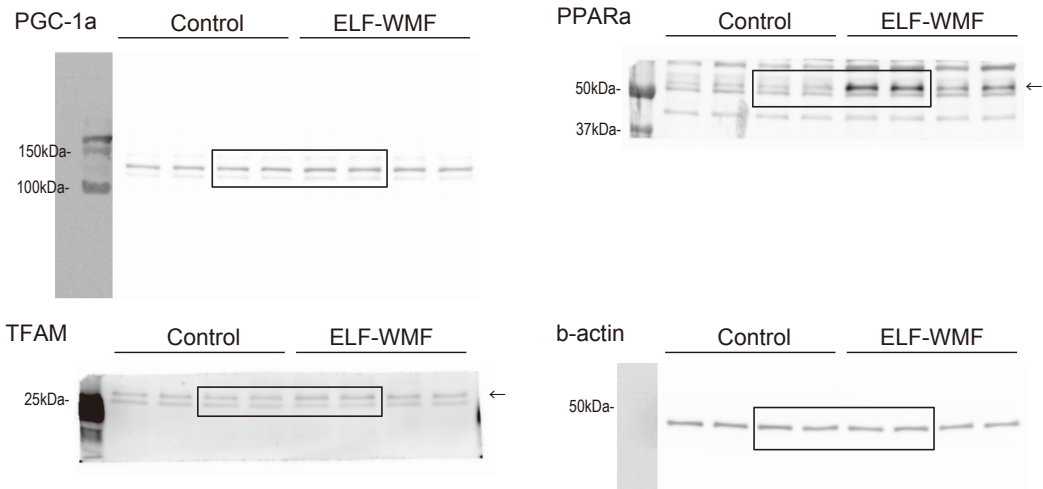

Fig.S3

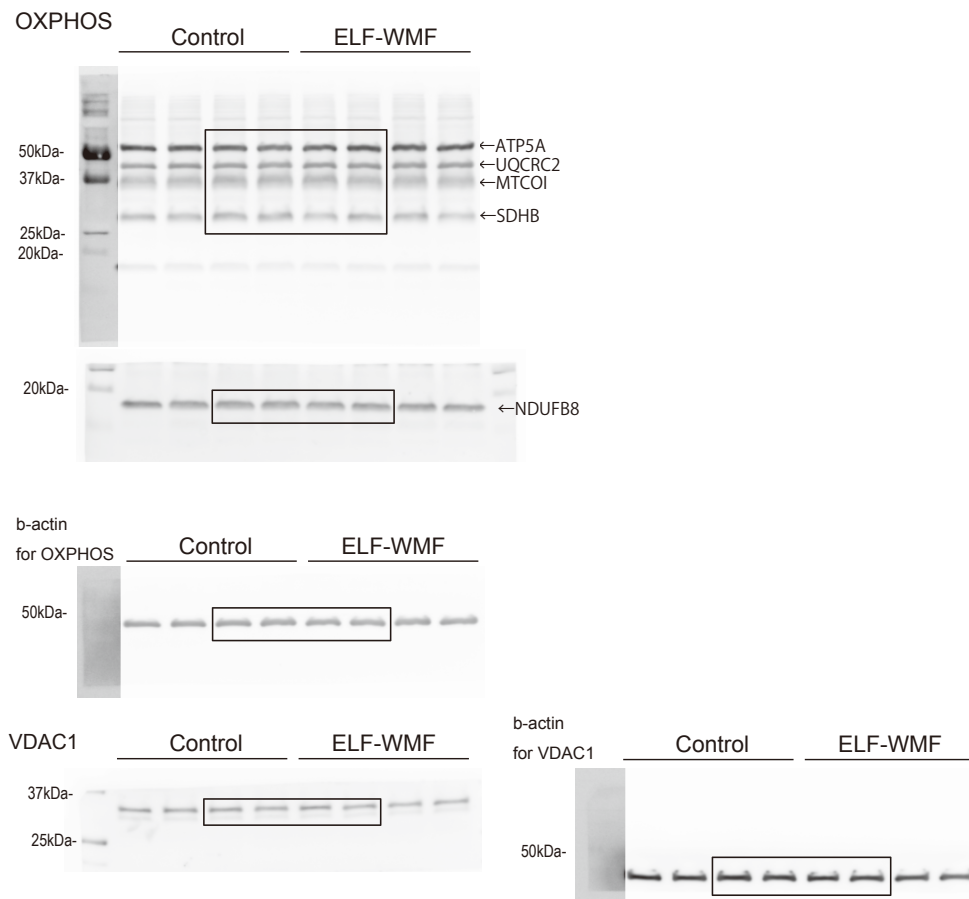

**Fig.S4b**

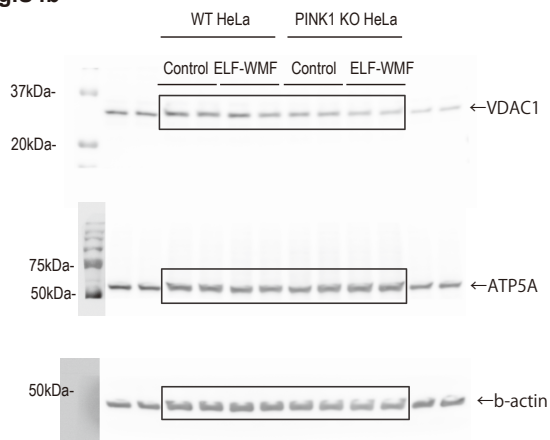

**Fig.S5**

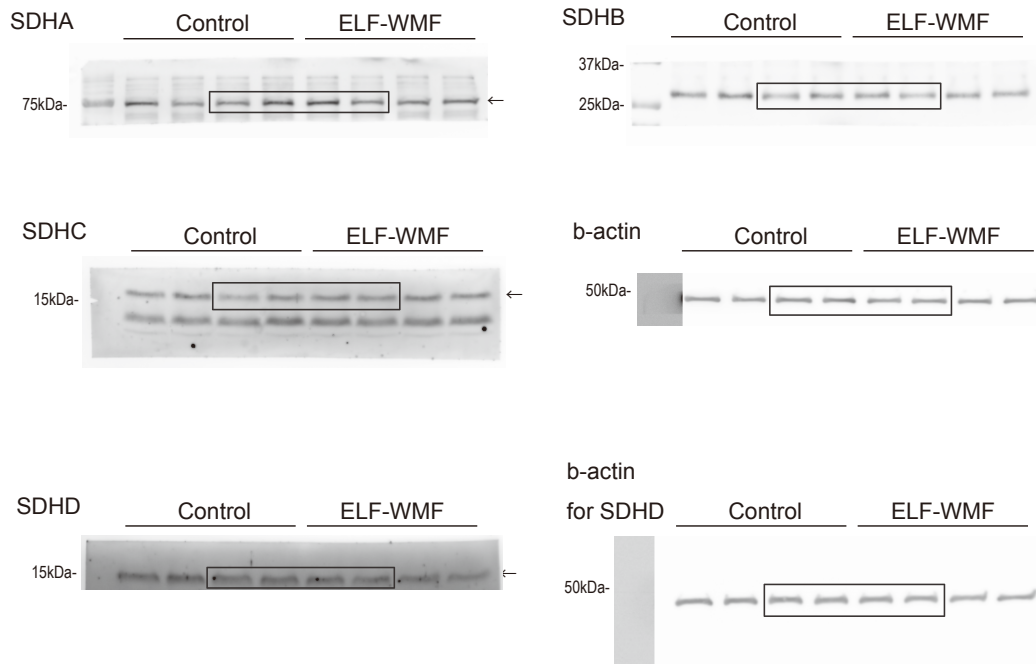

Supplement: 42003_2022_3389_MOESM2_ESM.pdf [file 42003_2022_3389_MOESM2_ESM.pdf]
