# Supplementary material for: Extremely low-frequency pulses of faint magnetic field induce mitophagy to rejuvenate mitochondria
Source: PubMed Central journal article supplement (PMC9098439; doi:10.1038/s42003-022-03389-7), 2022-05-12
Supplement: 42003_2022_3389_MOESM3_ESM.pdf [file 42003_2022_3389_MOESM3_ESM.pdf]

## Description of Additional Supplementary Files

**File name:** Supplementary Data

**Description:** Source data.
